# Supplementary material for: Effect of body mass index on vertebral and hip fractures in older people and differences according to sex: a retrospective Japanese cohort study
Source: PubMed Central journal article supplement — BMJ Open. 2021 Nov 9;11(11):e049157. doi: 10.1136/bmjopen-2021-049157 (PMC8578981; doi:10.1136/bmjopen-2021-049157), 2021-11-09
Supplement: bmjopen-2021-049157supp001.pdf [file bmjopen-2021-049157supp001.pdf]

**Appendix 1.** Prevalence of the comorbidities used to calculate the CCI

|                                | Total n = 24,691, n (%) | Males n = 10,853, n (%) | Females n = 13,838, n (%) |
|--------------------------------|-------------------------|-------------------------|---------------------------|
| Acute myocardial infraction    | 130 (0.5)               | 91 (0.8)*               | 39 (0.3)                  |
| Congestive heart failure       | 972 (3.9)               | 448 (4.1)               | 524 (3.8)                 |
| Peripheral vascular disease    | 3,365 (13.6)            | 1,593 (14.7)*           | 1,772 (12.8)              |
| Cerebral vascular disease      | 10,922 (44.2)           | 4,679 (43.1)*           | 6,243 (45.1)              |
| Dementia                       | 633 (2.6)               | 224 (2.1)*              | 409 (3.0)                 |
| Pulmonary disease              | 2,735 (11.1)            | 1,343 (12.4)*           | 1,392 (10.1)              |
| Connective tissue disorder     | 1,672 (6.7)             | 711 (6.6)               | 961 (6.9)                 |
| Peptic ulcer                   | 1,979 (8.0)             | 928 (8.6)*              | 1,051 (7.6)               |
| Mild liver disease             | 1,725 (7.0)             | 912 (8.4)*              | 813 (5.9)                 |
| Diabetes without complications | 1,273 (5.2)             | 724 (6.7)*              | 549 (4.0)                 |
| Diabetes with complications    | 1,013 (4.1)             | 583 (5.4)*              | 430 (3.1)                 |
| Paraplegia                     | 715 (2.9)               | 376 (3.5)*              | 339 (2.5)                 |
| Renal disease                  | 3,564 (14.4)            | 1,794 (16.5)*           | 1,770 (12.8)              |
| Cancer                         | 2,832 (11.5)            | 1,876 (17.1)*           | 972 (7.0)                 |
| Metastatic cancer              | 100 (0.4)               | 68 (0.6)*               | 32 (0.2)                  |
| Sever liver disease            | 13 (0.1)                | 8 (0.07)                | 5 (0.04)                  |
| HIV                            | 0 (0)                   | 0 (0)                   | 0 (0)                     |

CCI: Charlson comorbidity index, HIV: human immunodeficiency virus

\* Significantly different between males and females ( $P < .05$ ).

**Appendix. 2** Alive vs. death among participants

| Parameters                         | Alive<br>n = 19,282           | Death<br>n = 5,409          |
|------------------------------------|-------------------------------|-----------------------------|
| Age at examination<br>(years old)  | 78.7 ± 3.6 (75–99)*           | 82.1 ± 5.3 (75–103)         |
| Age categories, n (%)              |                               |                             |
| 75–79                              | 12,898 (66.9)*                | 2,034 (37.6)                |
| 80–84                              | 4,820 (25.0)*                 | 1,734 (32.1)                |
| 85≤                                | 1,564 (8.1)*                  | 1,641 (30.3)                |
| Sex; male/female, n (%)            | 7,795 (40.4) / 11,487 (59.6)* | 3,058 (56.5) / 2,351 (43.5) |
| BMI (kg/m <sup>2</sup> )           | 22.4 ± 3.0 (11.6–54.2)*       | 21.5 ± 3.2 (12.5–39.6)      |
| BMI categories                     |                               |                             |
| Underweight<br>(BMI < 18.5)        | 1,761 (9.1)*                  | 923 (17.1)                  |
| Normal weight<br>(18.5 ≤ BMI < 25) | 13,896 (72.1)                 | 3,771 (69.7)                |
| Overweight and Obese<br>(25 ≤ BMI) | 3,625 (18.8)                  | 715 (13.2)                  |
| CCI                                | 1.5 ± 1.6 (0–11)              | 2.3 ± 1.9 (0–10)            |
| CCI categories, n (%)              |                               |                             |
| Low                                | 4,134 (21.4)*                 | 576 (10.7)                  |
| Medium                             | 10,530 (54.6)                 | 2,452 (45.3)                |
| High                               | 3,627 (18.8)                  | 1,704 (31.5)                |
| Very high                          | 991 (5.1)                     | 677 (12.5)                  |
| Smoking, n (%)                     | 1,279 (6.6)*                  | 612 (11.3)                  |
| Use of alcohol, n (%)              | 7,442 (38.6)*                 | 2,002 (37.0)                |
| Osteoporosis, n (%)                | 3,126 (16.2)                  | 843 (15.6)                  |
| Follow-up duration<br>(year)       | 7.5 ± 0.3 (0.1–8.0)*          | 4.5 ± 2.0 (0.1–7.9)         |

Continuous values are expressed as mean ± standard deviation (range). BMI: body mass index, CCI: Charlson comorbidity index

\* Significantly different between alive and death ( $P < .05$ ).
